# Supplementary material
Source: MDPI journal article supplement (https://www.mdpi.com/2073-4352/13/5/750)
Supplement: s1 [file s1]

Archive with 3 entries (3 files):
- crystals-2361943-supplementary.pdf
- VidS1.AVI
- VidS2.AVI
